# Supplementary material for: Hyperswarming adaptations in a bacterium improve collective motility without enhancing single cell motility
Source: Royal Society of Chemistry journal article supplement (doi:10.1039/c3sm53127a), 2014-01-01
Supplement: c3sm53127a.pdf [file c3sm53127a.pdf]

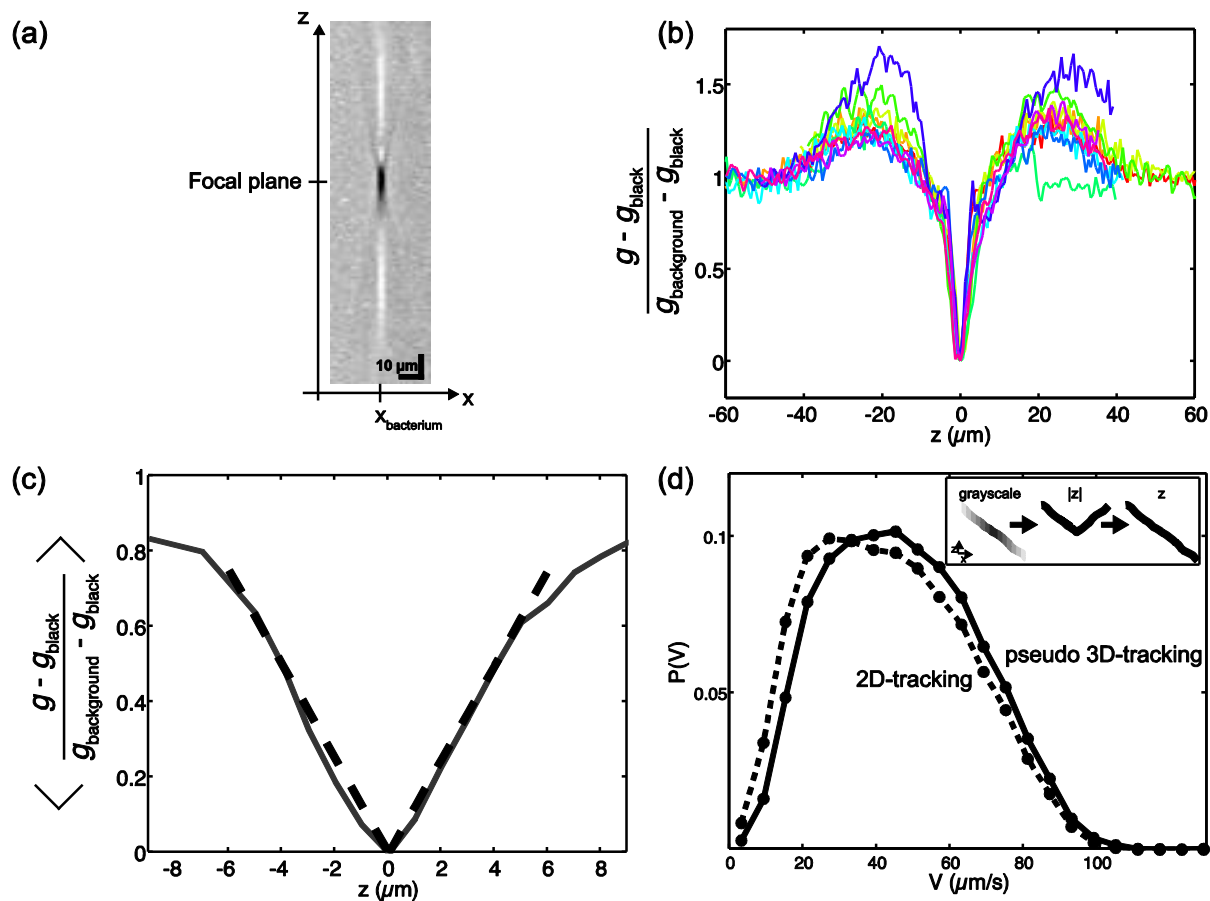

Fig. S1

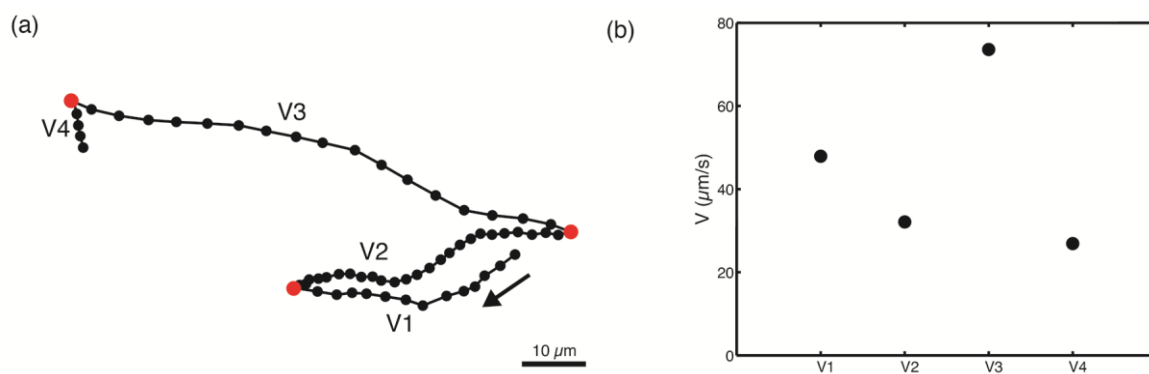

Fig. S2: collected from swarm and diluted in liquid, wild-type swims faster than hyperswarmer *fln(v178g)*. dots denote median velocities. lower and upper bound represent respectively 25% and 75% percentile of velocities distributions.

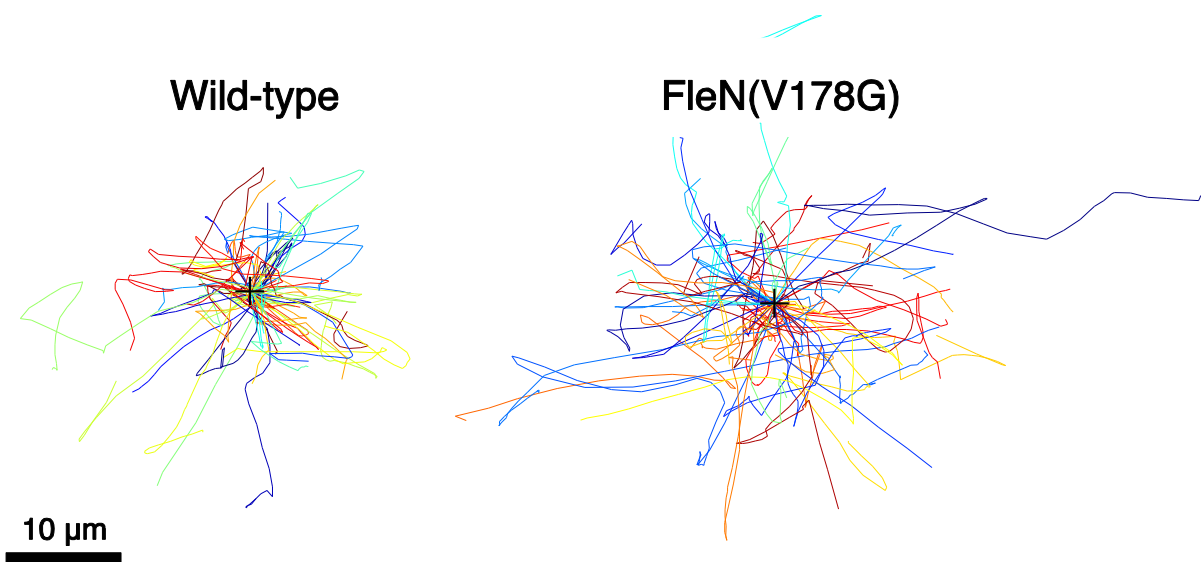

Fig. S3

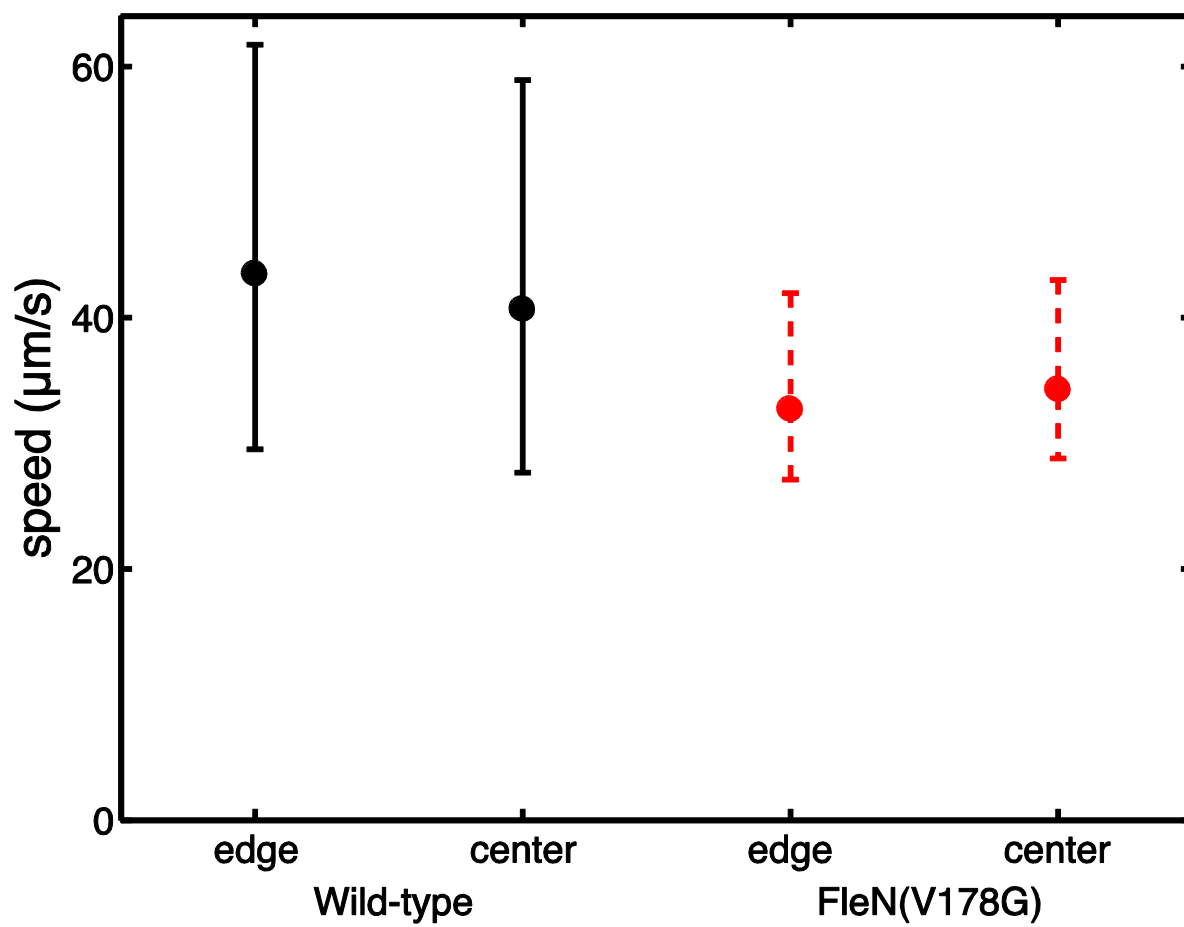

Fig. S4

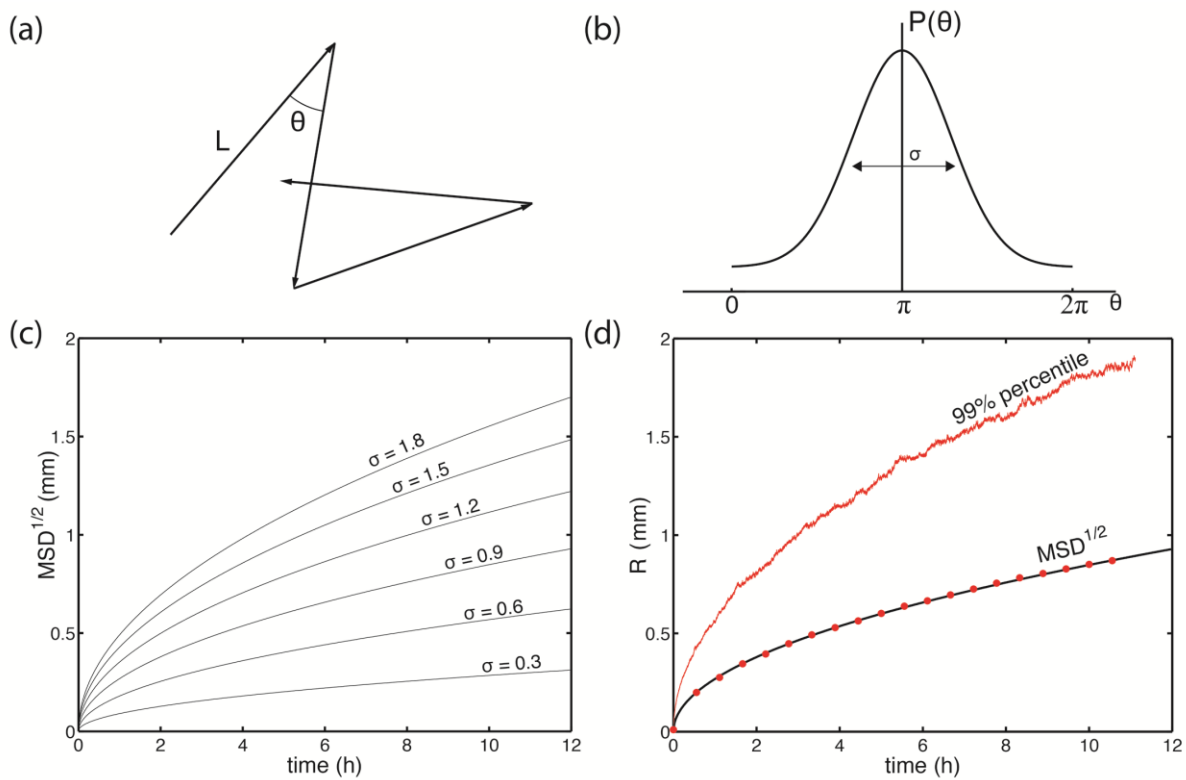

Fig. S5: 50 trajectories of detected bacteria swimming through agar, over a duration of 3 seconds. each trajectory is shifted in order to set the initial point at the origin (black cross).
